# Supplementary material
Source: HighWire-hosted journal article supplement (https://bmjopen.bmj.com/content/9/11/e032865)
Supplement: inline-supplementary-material-2 [file inline-supplementary-material-2.pdf]

## A Scoping Review Protocol to Map the Evidence of Experiences Related to Adolescent Idiopathic Scoliosis

### Supplementary file 2. Selection of sources flow charts.

Figure S2a. Flow chart step 1 template for the selection of sources of evidence from academic sources.

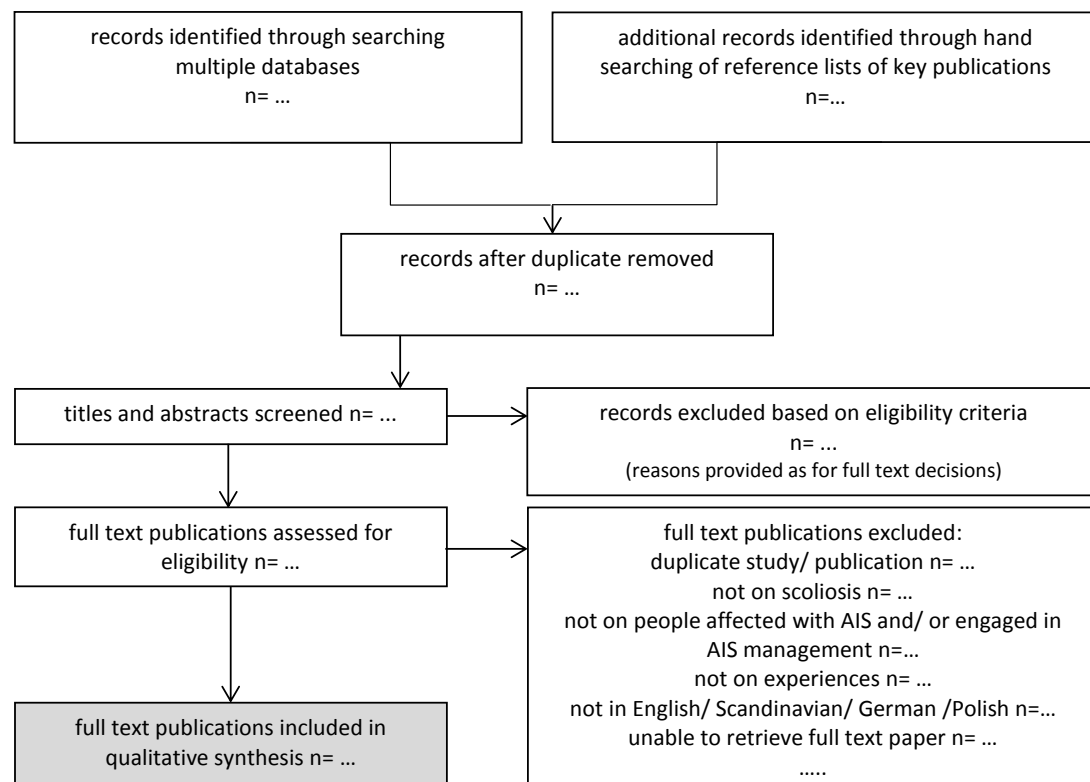

Figure S2b. Flow chart step 2 template for the selection of sources of evidence from grey literature. Adapted from Godin et al [syst rev 2015...], modified.

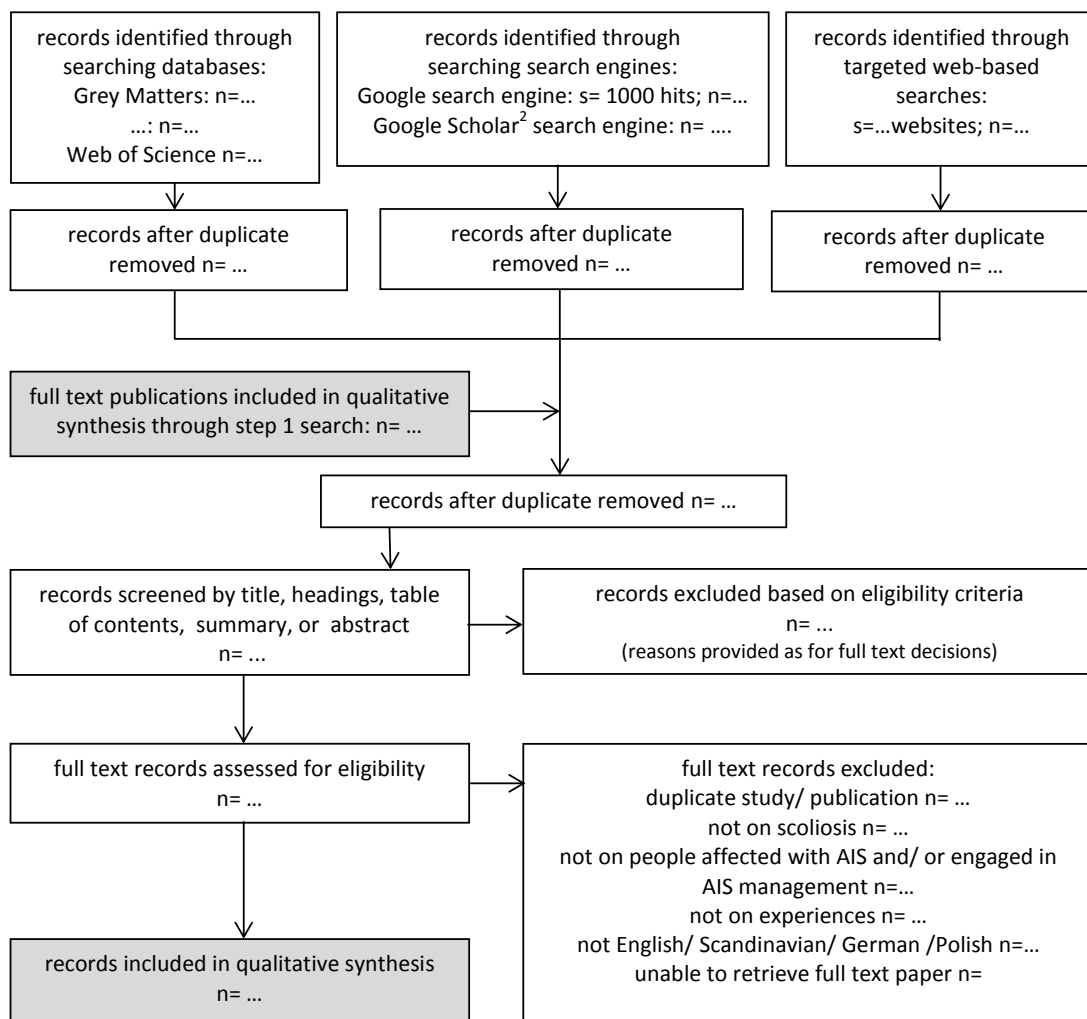

Table S2. Step 3 Hand search of the reference lists of key publications.

| key publications included for reference list searching | reference screened for eligibility | decision |                      |
|--------------------------------------------------------|------------------------------------|----------|----------------------|
|                                                        |                                    | include  | exclude, with reason |
| ..                                                     |                                    |          |                      |
| ..                                                     |                                    |          |                      |
