# Supplementary material
Source: HighWire-hosted journal article supplement (https://bmjopen.bmj.com/content/9/11/e032865)
Supplement: inline-supplementary-material-3 [file inline-supplementary-material-3.pdf]

# A Scoping Review Protocol to Map the Evidence of Experiences Related to Adolescent Idiopathic Scoliosis

## Supplementary file 3. Data charting form.

|                                                                                                                                             |                                |                                                             |                                                    |  |              |  |        |  |  |
|---------------------------------------------------------------------------------------------------------------------------------------------|--------------------------------|-------------------------------------------------------------|----------------------------------------------------|--|--------------|--|--------|--|--|
| <b>Study Details and Characteristics:</b>                                                                                                   |                                |                                                             |                                                    |  |              |  |        |  |  |
| Citation:                                                                                                                                   |                                |                                                             |                                                    |  |              |  |        |  |  |
| publication type:                                                                                                                           | academic:                      |                                                             | grey:                                              |  | unpublished: |  |        |  |  |
| Type of study                                                                                                                               | primary:                       |                                                             | secondary:                                         |  | tertiary:    |  | other: |  |  |
| Study design:                                                                                                                               |                                |                                                             |                                                    |  |              |  |        |  |  |
| Origin/ country of origin:<br>(where the study was conducted)                                                                               |                                |                                                             |                                                    |  |              |  |        |  |  |
| <b>Content:</b>                                                                                                                             |                                |                                                             |                                                    |  |              |  |        |  |  |
| Aims/ objectives of the study:                                                                                                              |                                |                                                             |                                                    |  |              |  |        |  |  |
| AIS as the problem:                                                                                                                         |                                |                                                             | Health conditions related to AIS as the problem:   |  |              |  |        |  |  |
| Diagnostics as the problem:                                                                                                                 |                                |                                                             | Screening as the problem:                          |  |              |  |        |  |  |
| Treatment as the problem:                                                                                                                   |                                |                                                             | Other people as the problem:                       |  |              |  |        |  |  |
| Cosmetics / appearance as the problem:                                                                                                      |                                |                                                             | Other (e.g. physical activity/ sports/ lifestyle): |  |              |  |        |  |  |
| Research questions (if applicable):                                                                                                         |                                |                                                             |                                                    |  |              |  |        |  |  |
| Eligibility criteria:                                                                                                                       |                                |                                                             |                                                    |  |              |  |        |  |  |
| What is reported<br>(e.g. views, opinions, experiences):                                                                                    |                                |                                                             |                                                    |  |              |  |        |  |  |
| How 'experience' is used<br>(definition / understanding)                                                                                    |                                |                                                             |                                                    |  |              |  |        |  |  |
| <b>Context:</b>                                                                                                                             |                                |                                                             |                                                    |  |              |  |        |  |  |
| Country/ region/ state:                                                                                                                     |                                |                                                             |                                                    |  |              |  |        |  |  |
| Culture and societal aspects (e.g. education, religion, beliefs, norms):                                                                    |                                |                                                             |                                                    |  |              |  |        |  |  |
| Setting (e.g. school, outpatient clinic, community/ home):                                                                                  |                                |                                                             |                                                    |  |              |  |        |  |  |
| Basis for the programme/ intervention/ treatment (national/ regional guidelines, statements, recommendations, individual programme, other): |                                |                                                             |                                                    |  |              |  |        |  |  |
| Scoliosis in the family:                                                                                                                    |                                |                                                             |                                                    |  |              |  |        |  |  |
| Other:                                                                                                                                      |                                |                                                             |                                                    |  |              |  |        |  |  |
| <b>Participants:</b>                                                                                                                        |                                |                                                             |                                                    |  |              |  |        |  |  |
| affected person(s) <input type="checkbox"/> relative(s) <input type="checkbox"/> other person(s) (who):                                     |                                |                                                             |                                                    |  |              |  |        |  |  |
| Age:                                                                                                                                        |                                | Number:                                                     |                                                    |  |              |  |        |  |  |
| Sex:                                                                                                                                        |                                | severity of AIS:                                            |                                                    |  |              |  |        |  |  |
| Data on progression:                                                                                                                        |                                |                                                             |                                                    |  |              |  |        |  |  |
| Treated <input type="checkbox"/>                                                                                                            |                                | Untreated <input type="checkbox"/>                          |                                                    |  |              |  |        |  |  |
| Other characteristics (e.g. related to relatives/ other people, e.g. scoliosis in the family)                                               |                                |                                                             |                                                    |  |              |  |        |  |  |
| <b>Details/Results/ outcomes extracted from study (in relation to the concept of the scoping review):</b>                                   |                                |                                                             |                                                    |  |              |  |        |  |  |
| How diagnosed:                                                                                                                              |                                |                                                             |                                                    |  |              |  |        |  |  |
| Screening <input type="checkbox"/>                                                                                                          | Visit <input type="checkbox"/> | Other (e.g. physiotherapist, leaflet used by parents):      |                                                    |  |              |  |        |  |  |
| Diagnostic imaging:                                                                                                                         | YES / NO                       | Details, if YES (e.g. device, dose, no of exposures, area): |                                                    |  |              |  |        |  |  |

|                                                                                         |  |                                                                   |  |
|-----------------------------------------------------------------------------------------|--|-------------------------------------------------------------------|--|
| Type of treatment(s)/ intervention(s) <input type="checkbox"/>                          |  | experiences related to untreated persons <input type="checkbox"/> |  |
| Length (and sequence, if applicable) of treatment(s):                                   |  |                                                                   |  |
| Primary (person-centred) outcomes:                                                      |  |                                                                   |  |
| Related to effectiveness (e.g. hopes and expectations):                                 |  |                                                                   |  |
| Related to harms (e.g. stigma, labellisation, pain, discomfort, x-ray exposure):        |  |                                                                   |  |
| Related to time, daily routine, time management and finance:                            |  |                                                                   |  |
| Other:                                                                                  |  |                                                                   |  |
| Secondary outcomes (any related to the treatment process, as in biomedical literature): |  |                                                                   |  |
| Effectiveness of intervention(s) (e.g. Cobb angle, progression):                        |  |                                                                   |  |
| Harms (biomedical, e.g. x-ray exposure):                                                |  |                                                                   |  |
| Other:                                                                                  |  |                                                                   |  |
| Additional information / notes:                                                         |  |                                                                   |  |
|                                                                                         |  |                                                                   |  |
| <b>key findings that relate to the scoping review questions:</b>                        |  |                                                                   |  |
| <b>gaps in the research/ practice:</b>                                                  |  |                                                                   |  |

Date:

Reviewer:
